# Supplementary material
Source: HighWire-hosted journal article supplement (https://gut.bmj.com/content/69/6/1053)
Supplement: inline-supplementary-material-2 [file inline-supplementary-material-2.pdf]

Supplementary Table 1. Patient characteristics

| Patients       |    | CDEI before | CDEI after | SES-CD before | SES-CD after | Gender | Montreal classification* |             |             | weeks between biopsies | Age at inclusion (years) | anti-TNF ** |
|----------------|----|-------------|------------|---------------|--------------|--------|--------------------------|-------------|-------------|------------------------|--------------------------|-------------|
|                |    |             |            |               |              |        | A1/A2/A3                 | L1/L2/L3/L4 | B1/B2/B3/+p |                        |                          |             |
| Responders     | 1  | 37          | 0          |               |              | F      | 2                        | 3           | 1           | 8                      | 23                       | IFX         |
|                | 2  | 38.5        | 10         |               |              | M      | 1                        | 3           | 3           | 8                      | 39                       | ADA         |
|                | 3  |             |            | 18            | 11           | M      | 2                        | 3           | 2           | 183                    | 25                       | ADA         |
|                | 4  |             |            | 3             | 1            | F      | 2                        | 3           | 2           | 17                     | 20                       | ADA         |
|                | 5  |             |            | 22            | 9            | F      | 2                        | 3           | 2p          | 129                    | 56                       | ADA         |
|                | 6  |             |            | 4             | 0            | F      | 2                        | 3           | 2           | 66                     | 35                       | ADA         |
|                | 7  |             |            | 27            | 0            | F      | 2                        | 3           | 1           | 13                     | 40                       | ADA         |
| Non-responders | 8  | 5.2         | 6.4        |               |              | F      | 2                        | 1           | 1           | 8                      | 31                       | ADA         |
|                | 9  | 19          | 19.8       |               |              | F      | 2                        | 3           | 2           | 8                      | 23                       | IFX         |
|                | 10 | 4           | 8          |               |              | M      | 2                        | 3           | 2           | 8                      | 61                       | ADA         |
|                | 11 | 3.2         | 6.76       |               |              | M      | 2                        | 1           | 2           | 8                      | 20                       | ADA         |
|                | 12 |             |            | 3             | 3            | M      | 2                        | 3+4         | 3p          | 29                     | 39                       | ADA         |
|                | 13 |             |            | 5             | 4            | M      | 2                        | 3           | 3           | 20                     | 48                       | ADA         |
|                | 14 |             |            | 15            | 15           | F      | 2                        | 3           | 3p          | 54                     | 51                       | ADA         |

CDEI= Crohn's Disease Endoscopic Index for severity, SES-CD= Simple Endoscopic Severity Crohn's Disease.\* Montreal classification: Age at diagnosis: A1: <17 years, A2: 17–40 years, A3: >40 years; Maximal location of disease: L1: ileal, L2: colonic, L3: ileocolonic, L4: upper disease; Maximal disease behaviour: B1: non-stricturing, non-penetrating, B2: stricturing, B3: penetrating, p: perianal disease. \*\* IFX: Infliximab, ADA: Adalimumab
