# Supplementary material
Source: HighWire-hosted journal article supplement (https://gut.bmj.com/content/69/6/1053)
Supplement: inline-supplementary-material-4 [file inline-supplementary-material-4.pdf]

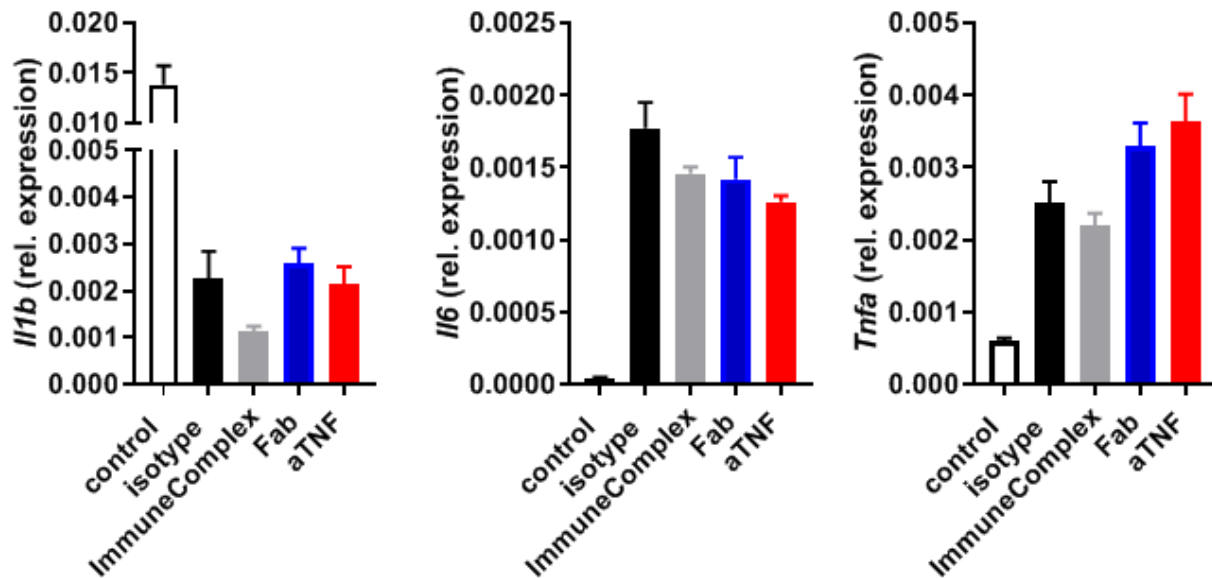

Supplementary Figure S2: Pro-inflammatory cytokine mRNA levels in BMDMs treated with anti-TNF (related to Figure 4):

Levels of *Il1b*, *Il6* and *Tnfa* normalized for *Gapdh* expression in BMDMs after 24 hours stimulation with LPS (100 ng/ml) and IFN- $\gamma$  (20 ng/ml) in combination with the IgG isotype control antibody (10  $\mu$ g/ml), IgG immune complex (10  $\mu$ g/ml), the anti-TNF mAb (10  $\mu$ g/ml) or Fab (equimolar concentration: 7.2  $\mu$ g/ml).
