# Supplementary material
Source: HighWire-hosted journal article supplement (https://gut.bmj.com/content/69/6/1053)
Supplement: inline-supplementary-material-5 [file inline-supplementary-material-5.pdf]

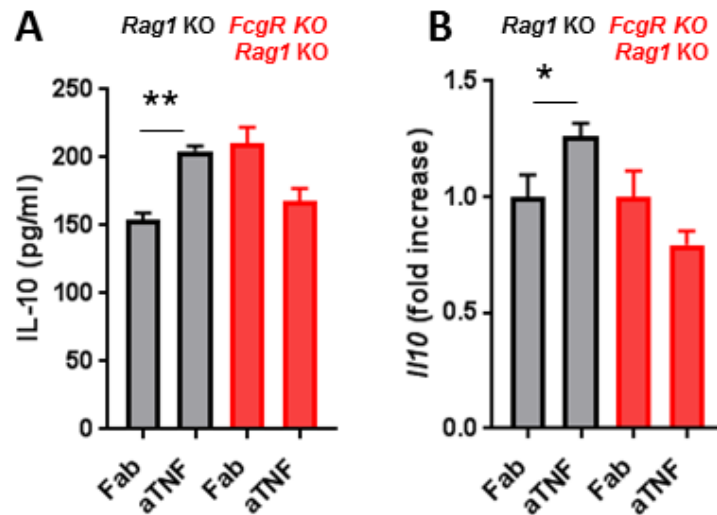

Supplementary Figure S3: Anti-TNF increased IL-10 in BMDMs is dependent on FcγR (related to Figure 4):

IL-10 levels in medium of *Rag1*KO BMDMs (grey) and *FcgR*KO/*Rag* KO BMDMs (red) stimulated with LPS (100 ng/ml), IFN-γ (20 ng/ml) and the anti-TNF mAb (10 μg/ml) or Fab (equimolar concentration: 7.2 μg/ml) after 48 hours (A). Levels of *I/10* normalized for *Gapdh* expression in BMDMs after 24 hours (B).
