# Supplementary material
Source: HighWire-hosted journal article supplement (https://gut.bmj.com/content/69/6/1053)
Supplement: inline-supplementary-material-7 [file inline-supplementary-material-7.pdf]

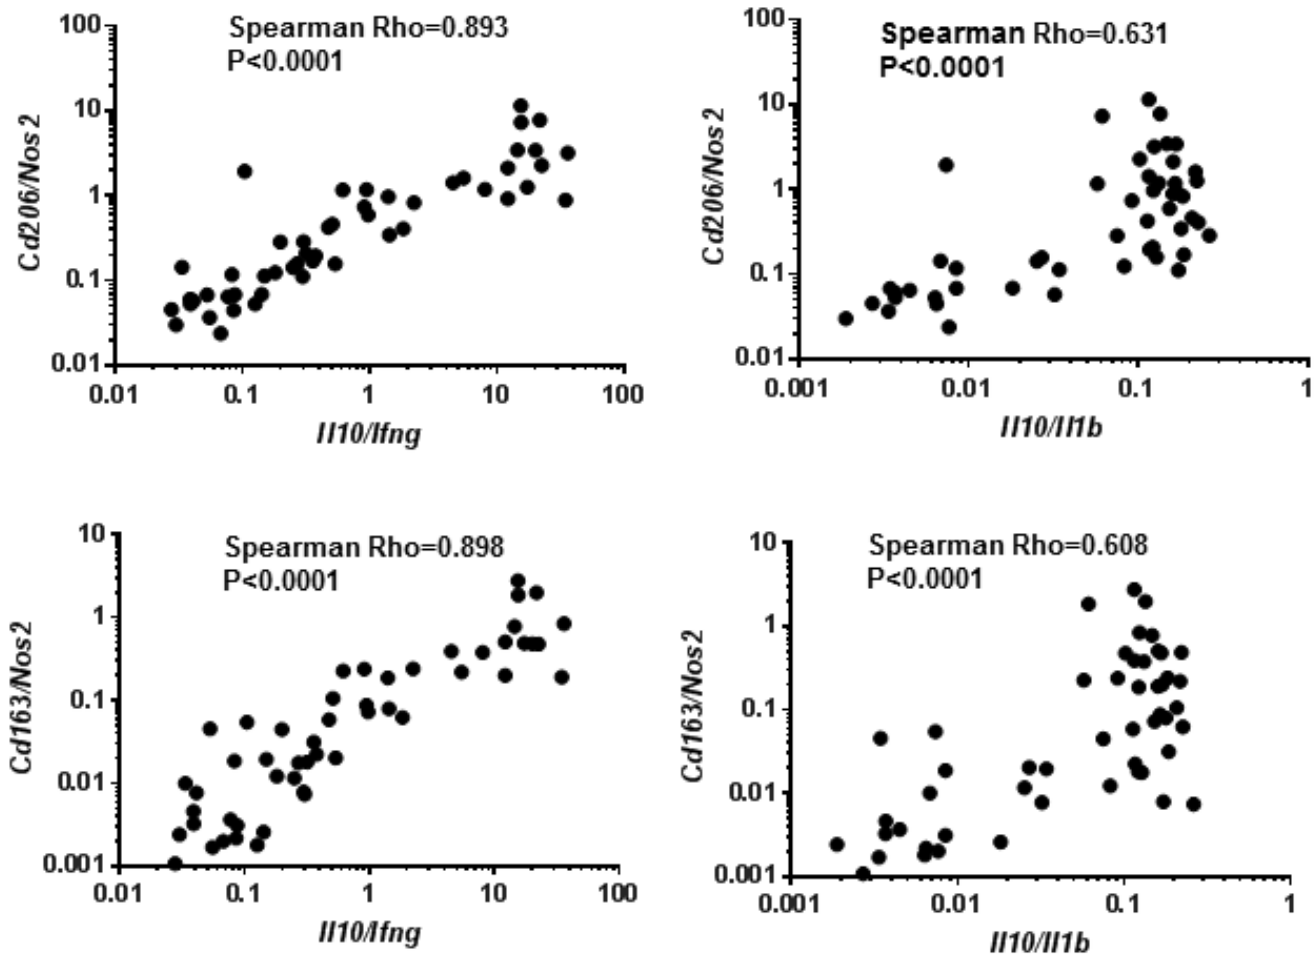

Supplementary Figure S5: (related to Figure 6):

Spearman correlations between the  $Il10/Irfng$  and  $Cd206/Nos2$ ,  $Il10/Il1b$  and  $Cd206/Nos2$ , between  $Il10/Irfng$  and  $Cd163/Nos2$ ,  $Il10/Il1b$  and  $Cd163/Nos2$  of the  $Rag1$  KO and  $LysMcrel10ra^{fl/m}$   $Rag1$  KO animals.
