# Supplementary material
Source: HighWire-hosted journal article supplement (https://gut.bmj.com/content/69/6/1053)
Supplement: inline-supplementary-material-8 [file inline-supplementary-material-8.pdf]

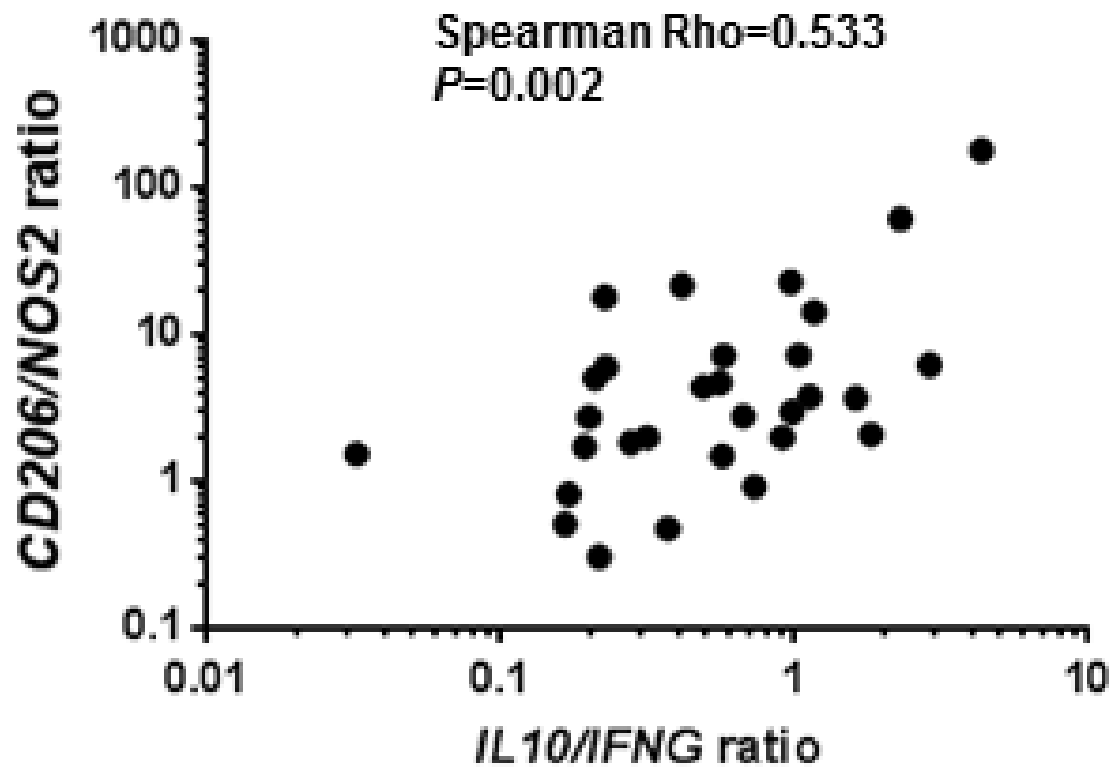

Supplementary Figure S6 (related to Figure 7):

The correlation between the *IL10/IFNG* and *CD206/NOS2* ratio in intestinal biopsies of CD patients.
